# Supplementary material for: Ma-Huang-Fu-Zi-Xi-Xin Decoction for Allergic Rhinitis: A Systematic Review
Source: Evid Based Complement Alternat Med. 2018 Feb 5;2018:8132798. doi: 10.1155/2018/8132798 (PMC5832110; doi:10.1155/2018/8132798)
Supplement: Supplementary Materials — Figure S1: flow diagram of study selection process in this systematic review. Figure S2: risk of bias graph of authors' judgements about included studies. Figure S3: risk of bias summary of authors' judgements about included studies. Figure S4: efficacy of 6 RCTs of MHFZXXD versus western medical therapy. Figure S5: safety of MHFZXXD versus western medical therapy. Figure S6: six months of recurrence of MHFZXXD versus western medical therapy. Table S2: quality of evidence for outcome measure of efficacy. Table S3: quality of evidence for outcome measures of safety. Table S4: quality of evidence for outcome measure of recurrence rate. Table S1: characteristics of included studies. Table S2: characteristics of excluded studies. [file 8132798.f1.zip]

Archive with 11 entries (10 files):
- 8132798.f1/
- 8132798.f1/picture1-flow diagram.docx
- 8132798.f1/picture2-risk of bias graph.docx
- 8132798.f1/picture3-risk of bias summary.docx
- 8132798.f1/picture4-forest plot.docx
- 8132798.f1/picture5-adverse events.docx
- 8132798.f1/picture6-recurrence rate.docx
- 8132798.f1/Table S1. Characteristics of included studies..docx
- 8132798.f1/Table S2 Quality of evidence for outcome measure of efficacy.docx
- 8132798.f1/Table S3 Quality of evidence for outcome measures of safety.docx
- 8132798.f1/Table S4 Quality of evidence for outcome measure of recurrence rate.docx
